# Supplementary material
Source: PubMed Central journal article supplement (PMC3416623)
Supplement: AEM.01511-12_zam999103587so1.pdf [file AEM.01511-12_zam999103587so1.pdf]

**TABLE S1.** Bacterial strains and plasmids used in this study

| Strains or plasmids                | Characteristics                                                                                                                                                                     | Reference or source |
|------------------------------------|-------------------------------------------------------------------------------------------------------------------------------------------------------------------------------------|---------------------|
| Strains                            |                                                                                                                                                                                     |                     |
| <i>K. pneumoniae</i> M5a1          | 3-hydroxybenzoate utilizer, Wild type                                                                                                                                               | (3)                 |
| <i>P. putida</i> PaW340            | Trp <sup>-</sup> Str <sup>r</sup> ; plasmid-free derivative of <i>P. putida</i> mt-2, grown on catechol through <i>ortho</i> -cleavage pathway, 3-hydroxybenzoate <sup>-</sup>      | (5, 9)              |
| <i>E. coli</i> DH5 $\alpha$        | <i>supE44</i> $\Delta$ <i>lacY169</i> ( $\phi$ 80 <i>lacZ</i> $\Delta$ M15) <i>hsdR17</i> <i>recA1</i> <i>endA1</i> <i>gyrA96</i> <i>thi-1</i> <i>relA1</i>                         | Gibco, BRL          |
| <i>E. coli</i> HB101               | <i>supE44</i> <i>hsdS20</i> ( $r_B^- m_B^-$ T <i>recA13</i> <i>ara-14</i> <i>proA2</i> <i>lacY1</i> <i>galK2</i> <i>rpsL20</i> <i>xyl-5mtl-1</i>                                    | (1)                 |
| <i>E. coli</i> Rosetta (DE3) pLysS | F <sup>-</sup> <i>ompT</i> <i>hsdS<sub>B</sub></i> ( $r_B$ $m_B$ ) <i>gal</i> <i>dcm</i> <i>lacY1</i> (DE3) pLysSRARE <sup>2</sup> (Cm <sup>r</sup> )                               | Novagen, USA        |
| <i>E. coli</i> BL21 (DE3)          | <i>hsdS</i> <i>gal</i> (XcIts857 ind-1 Sam7 <i>nin-5</i> <i>lacUV5-T7</i> gene 1)                                                                                                   | Novagen, USA        |
| Plasmids                           |                                                                                                                                                                                     |                     |
| pUC18                              | Ap <sup>r</sup> ; cloning vector                                                                                                                                                    | Takara              |
| pET5a                              | Expression vector: Ap <sup>r</sup> ; NdeI site overlapping the initiating start codon downstream of T7 promoter and multicloning site                                               | Novagen             |
| pRK415                             | Tc <sup>r</sup> ; mobilizable broad-host-range vector; origin of replication ( <i>oriV</i> ) and origin of transfer ( <i>oriT</i> ) of RK2                                          | (6)                 |
| pVLT33                             | Km <sup>r</sup> , broad-host-range expression vector (IncQ, RSF1010 replicon) Km <sup>r</sup> , <i>Ptac</i> , <i>lacI<sup>q</sup></i> <i>tra<sup>-</sup></i> <i>mob<sup>+</sup></i> | (2)                 |
| pRK2013                            | ColE1 replicon, Km <sup>r</sup> , <i>tra<sup>+</sup></i> , helper plasmid                                                                                                           | (4)                 |
| pGFPe                              | Km <sup>r</sup> , ColE1 replicon, derivative of pWaldo digested with XbaI and EcoRI, yielding a 14 amino acid-long linker sequence (SVPGSENL YFQGQF) followed by GFP                | (7)                 |
| pBSI                               | An 8-kb SphI fragment from pNDR20 (8) inserted into pUC18                                                                                                                           | R.A. Cooper         |
| pZWGM18                            | PCR fragment containing <i>mhbM</i> inserted into pUC18 at the EcoRI restriction site                                                                                               | This study          |
| pZWGD18                            | PCR fragment containing <i>mhbD</i> inserted into pUC18 at the EcoRI restriction site                                                                                               | This study          |
| pZWGH18                            | PCR fragment containing <i>mhbH</i> inserted into pUC18 at the EcoRI restriction site                                                                                               | This study          |
| pZWGI18                            | PCR fragment containing <i>mhbI</i> inserted into pUC18 at the EcoRI restriction site                                                                                               | This study          |
| pZWGM5                             | <i>mhbM</i> from pZWGM18 inserted into pET5a at the NdeI and EcoRI restriction sites                                                                                                | This study          |
| pZWGD5                             | <i>mhbD</i> from pZWGD18 inserted into pET5a at the NdeI and EcoRI restriction sites                                                                                                | This study          |

|          |                                                                                                                                                    |            |
|----------|----------------------------------------------------------------------------------------------------------------------------------------------------|------------|
| pZWGH5   | <i>mhbH</i> from pZWGH18 inserted into pET5a at the NdeI and EcoRI restriction sites                                                               | This study |
| pZWGI5   | <i>mhbI</i> from pZWGI18 inserted into pET5a at the NdeI and EcoRI restriction sites                                                               | This study |
| pZWGRT5  | A 6.3-kb EcoRI fragment containing the <i>mhb</i> gene cluster from pSBI inserted into pUC18                                                       | This study |
| pZWGT5   | pZWGRT5 was digested at EcoNI sites to delete a 639 bp fragment in <i>mhbT</i> and then re-ligated                                                 | This study |
| pZWXY001 | PCR fragment containing <i>mhbT</i> inserted into pVLT33 at the EcoRI and HindIII restriction sites                                                | This study |
| pZWXY002 | A 6.3-kb EcoRI fragment carrying the <i>mhb</i> gene cluster inserted into pRK415                                                                  | This study |
| pZWXY003 | A 5.6-kb EcoRI fragment carrying the <i>mhb</i> gene cluster with a 639 bp EcoNI fragment deletion in <i>mhbT</i> from pZWGT5 inserted into pRK415 | This study |
| pZWXY004 | PCR fragment containing <i>mhbT-gfp</i> inserted into pVLT33 at the EcoRI and HindIII restriction sites                                            | This study |
| pZWXY005 | PCR fragment containing <i>gfp</i> inserted into pVLT33 at the EcoRI and HindIII restriction sites                                                 | This study |
| pZWXY006 | PCR fragment containing <i>mhbT</i> without a stop codon inserted into pGFPe at the XbaI and EcoRI restriction sites                               | This study |
| pZWXY007 | PCR fragment containing mutated <i>mhbT</i> (for D82A change) inserted into pVLT33 at the EcoRI and HindIII restriction sites                      | This study |
| pZWXY008 | PCR fragment containing mutated <i>mhbT</i> (for V311W change) inserted into pVLT33 at the EcoRI and HindIII restriction sites                     | This study |
| pZWXY009 | PCR fragment containing mutated <i>mhbT</i> (for D314A change) inserted into pVLT33 at the EcoRI and HindIII restriction sites                     | This study |

## REFERENCE

1. **Boyer, H. W., and D. Roulland-Dussoix.** 1969. A complementation analysis of the restriction and modification of DNA in *Escherichia coli*. *J Mol Biol* **41**:459-72.
2. **de Lorenzo, V., L. Eltis, B. Kessler, and K. N. Timmis.** 1993. Analysis of *Pseudomonas* gene products using *lacI<sup>f</sup>/Ptrp-lac* plasmids and transposons that confer conditional phenotypes. *Gene* **123**:17-24.
3. **Dixon, R. A., and J. R. Postgate.** 1971. Transfer of nitrogen-fixation genes by conjugation in *Klebsiella pneumoniae*. *Nature* **234**:47-8.
4. **Figurski, D. H., and D. R. Helinski.** 1979. Replication of an origin-containing derivative of plasmid RK2 dependent on a plasmid function provided in trans. *Proc Natl Acad Sci U S A* **76**:1648-52.
5. **Jeenes, D. J., and P. A. Williams.** 1982. Excision and integration of degradative

- pathway genes from TOL plasmid pWW0. J Bacteriol **150**:188-94.
6. **Keen, N. T., S. Tamaki, D. Kobayashi, and D. Trollinger.** 1988. Improved broad-host-range plasmids for DNA cloning in gram-negative bacteria. Gene **70**:191-7.
  7. **Rapp, M., D. Drew, D. O. Daley, J. Nilsson, T. Carvalho, K. Melen, J. W. De Gier, and G. Von Heijne.** 2004. Experimentally based topology models for *E. coli* inner membrane proteins. Protein Sci **13**:937-45.
  8. **Robson, N. D., S. Parrott, and R. A. Cooper.** 1996. In vitro formation of a catabolic plasmid carrying *Klebsiella pneumoniae* DNA that allows growth of *Escherichia coli* K-12 on 3-hydroxybenzoate. Microbiology **142**:2115-20.
  9. **Williams, P. A., and K. Murray.** 1974. Metabolism of benzoate and the methylbenzoates by *Pseudomonas putida* (*arvilla*) mt-2: evidence for the existence of a TOL plasmid. J Bacteriol **120**:416-23.
