# Supplementary material
Source: PubMed Central journal article supplement (PMC3416623)
Supplement: AEM.01511-12_zam999103587so2.pdf [file AEM.01511-12_zam999103587so2.pdf]

**TABLE S2.** Primers used in this study <sup>b</sup>

| Name                     | Sequence (5'-3')                           | Notes                                               |
|--------------------------|--------------------------------------------|-----------------------------------------------------|
| <i>mhbM</i><br>forward   | 5'-GGCTTAGGAATTCATATGGCAAAGTGA-3'          | Forward primer for <i>mhbM</i>                      |
| <i>mhbM</i><br>reverse   | 5'-CCGGGAATTCACGGCGTCAGGCTG-3'             | Reverse primer for <i>mhbM</i>                      |
| <i>mhbD</i><br>forward   | 5'-GGAGAATTCATATGTCCCAGTCCAC-3'            | Forward primer for <i>mhbD</i>                      |
| <i>mhbD</i><br>reverse   | 5'-GTAGAATTCATGATTCGATTCCTTA-3'            | Reverse primer for <i>mhbD</i>                      |
| <i>mhbH</i><br>forward   | 5'-ATAAGGAATTCACATATGACTCAATACG-3'         | Forward primer for <i>mhbH</i>                      |
| <i>mhbH</i><br>reverse   | 5'-GCCGGAATTCAGCGCGTTCTG-3'                | Reverse primer for <i>mhbH</i>                      |
| <i>mhbI</i><br>forward   | 5'-CGTGGAATTCGGCATAATGATGAAGCTGTACAGTTT-3' | Forward primer for <i>mhbI</i>                      |
| <i>mhbI</i> reverse      | 5'-GCCGACAAGAATTCCTCGCATCACTTTTG-3'        | Reverse primer for <i>mhbI</i>                      |
| <i>mhbT</i><br>forward   | 5'-GGCGAATTCATGACTCAACGACTTGAA-3'          | Forward primer for <i>mhbT</i>                      |
| <i>mhbT</i><br>reverse   | 5'-GGCAAGCTTTTATTTATTCACAATGCCTGC-3'       | Reverse primer for <i>mhbT</i>                      |
| <i>mhbT-2</i><br>forward | 5'-GGCTCTAGAATGACTCAACGACTTGAA-3'          | Forward primer for <i>mhbT</i>                      |
| <i>mhbT-2</i><br>reverse | 5'-GGCGAATTCCTTTATTCACAATGCCTGC-3'         | Reverse primer for <i>mhbT</i> without a stop codon |
| <i>gfp</i> forward       | 5'-GGCGAATTCATGAGCAAAGGAGAAGAA-3'          | Forward primer for <i>gfp</i>                       |
| <i>gfp</i> reverse       | 5'-TATAAGCTTTCAGTGGTGGTGGTGGTG-3'          | Reverse primer for <i>gfp</i>                       |

<sup>b</sup> The EcoRI restriction site is underlined site, the NdeI restriction site is italic, the HindIII restriction site is boldface, and the XbaI restriction site is boldface and underlined.
